# Supplementary material for: The multi-dimensional equity of predictive models in acute ischaemic stroke
Source: Research Square preprint supplement (doi:10.21203/rs.3.rs-8056415/v1), 2025-11-10
Supplement: Supplementary file 1 [file 9d8cf6a60937aaf591716cad.pdf]

## Supplementary Information

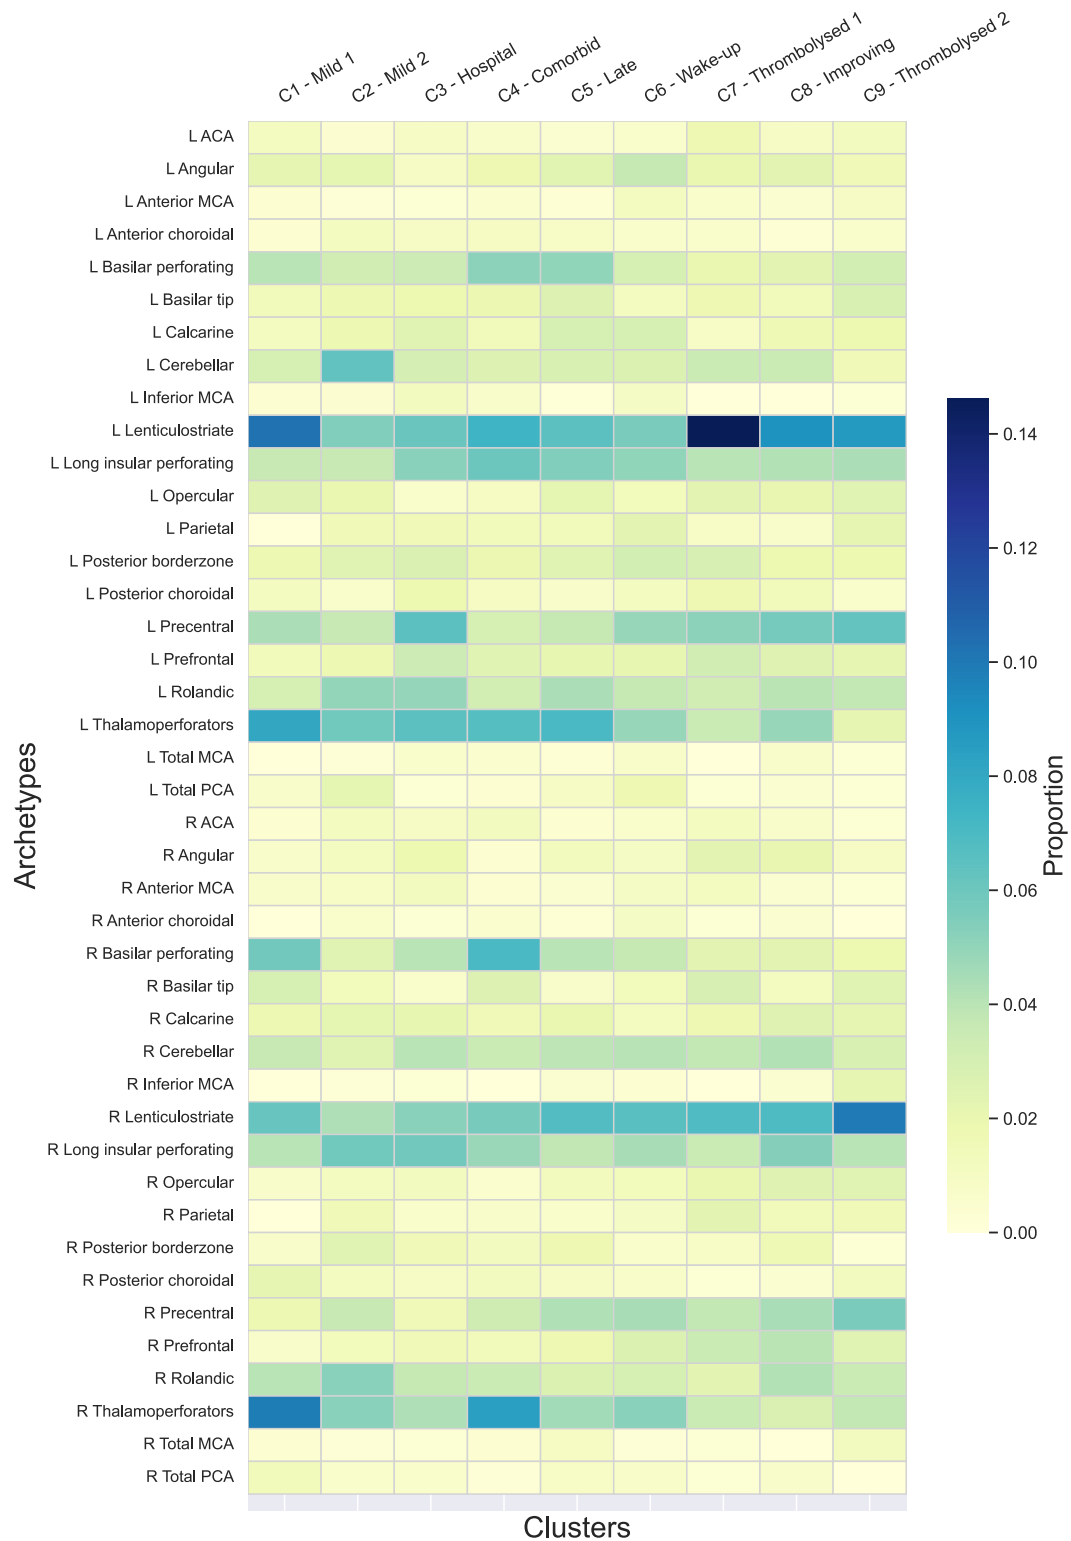

**Figure S1.** Heatmap showing the distribution of lesion archetypes across the nine clinical–demographic clusters.

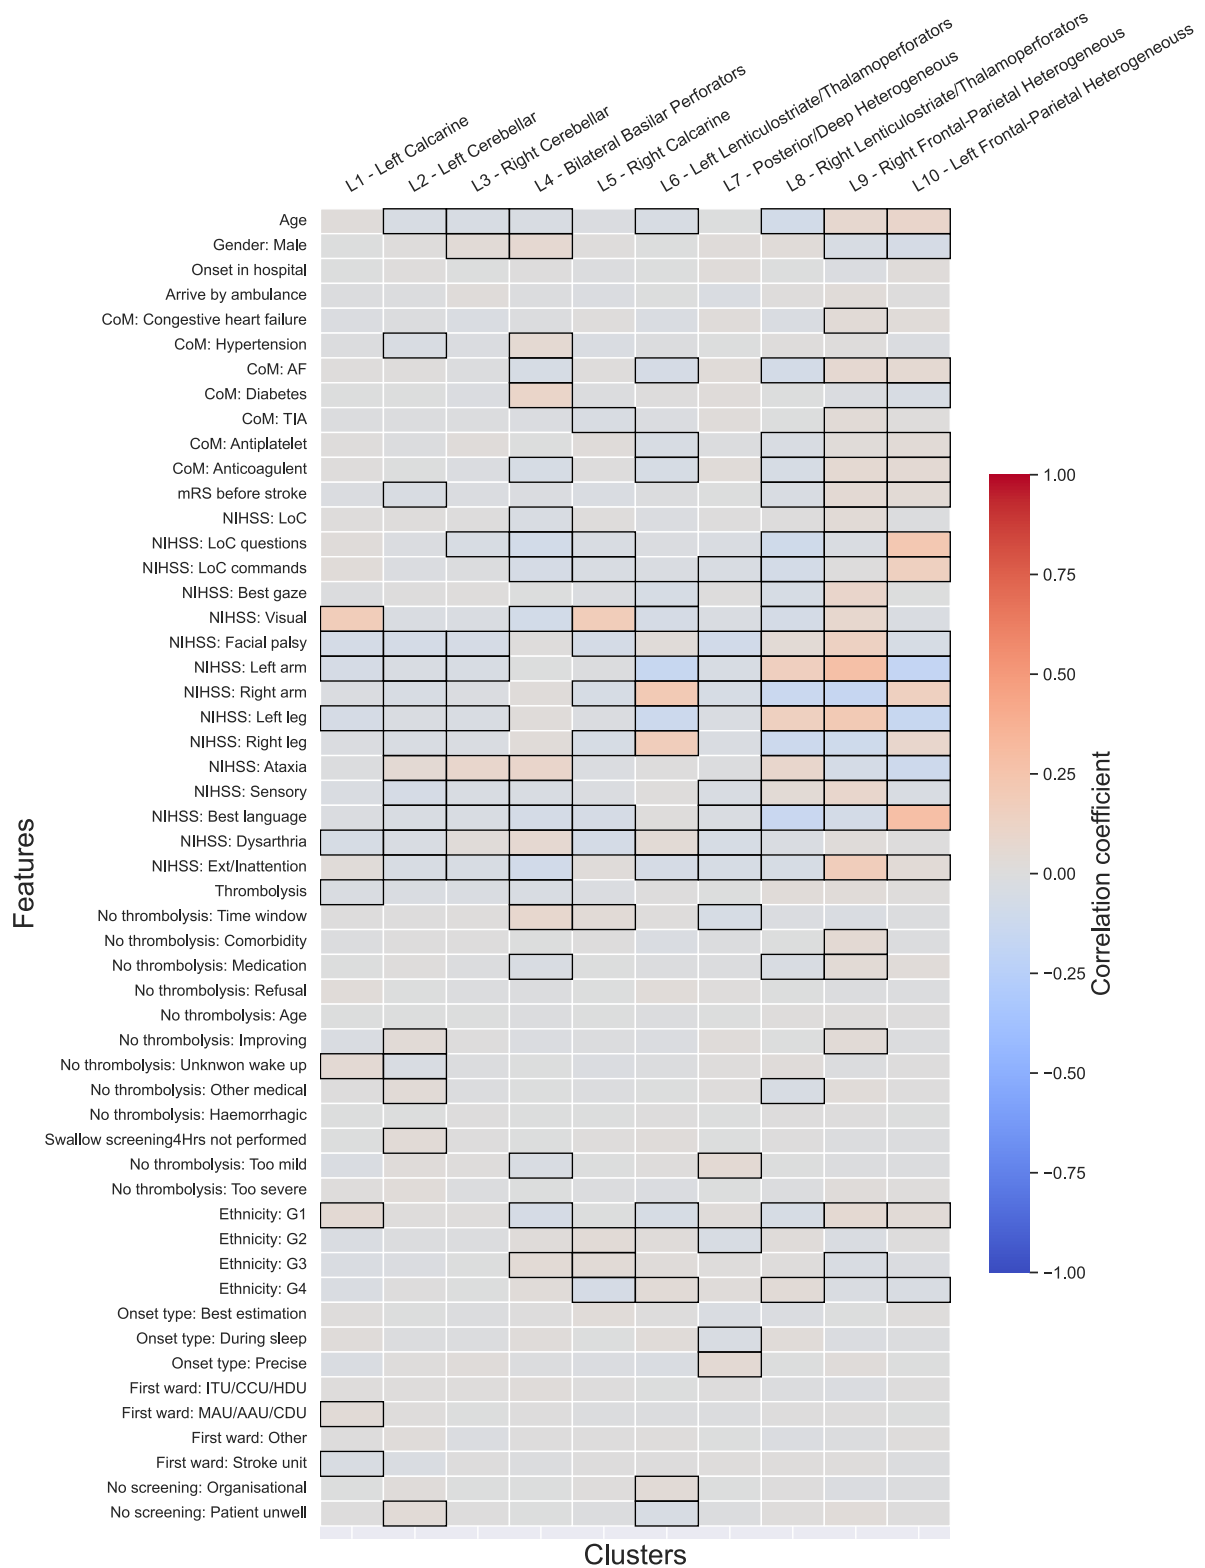

**Figure S2.** Heatmap showing the distribution of clinical-demographic features across the ten lesion clusters.

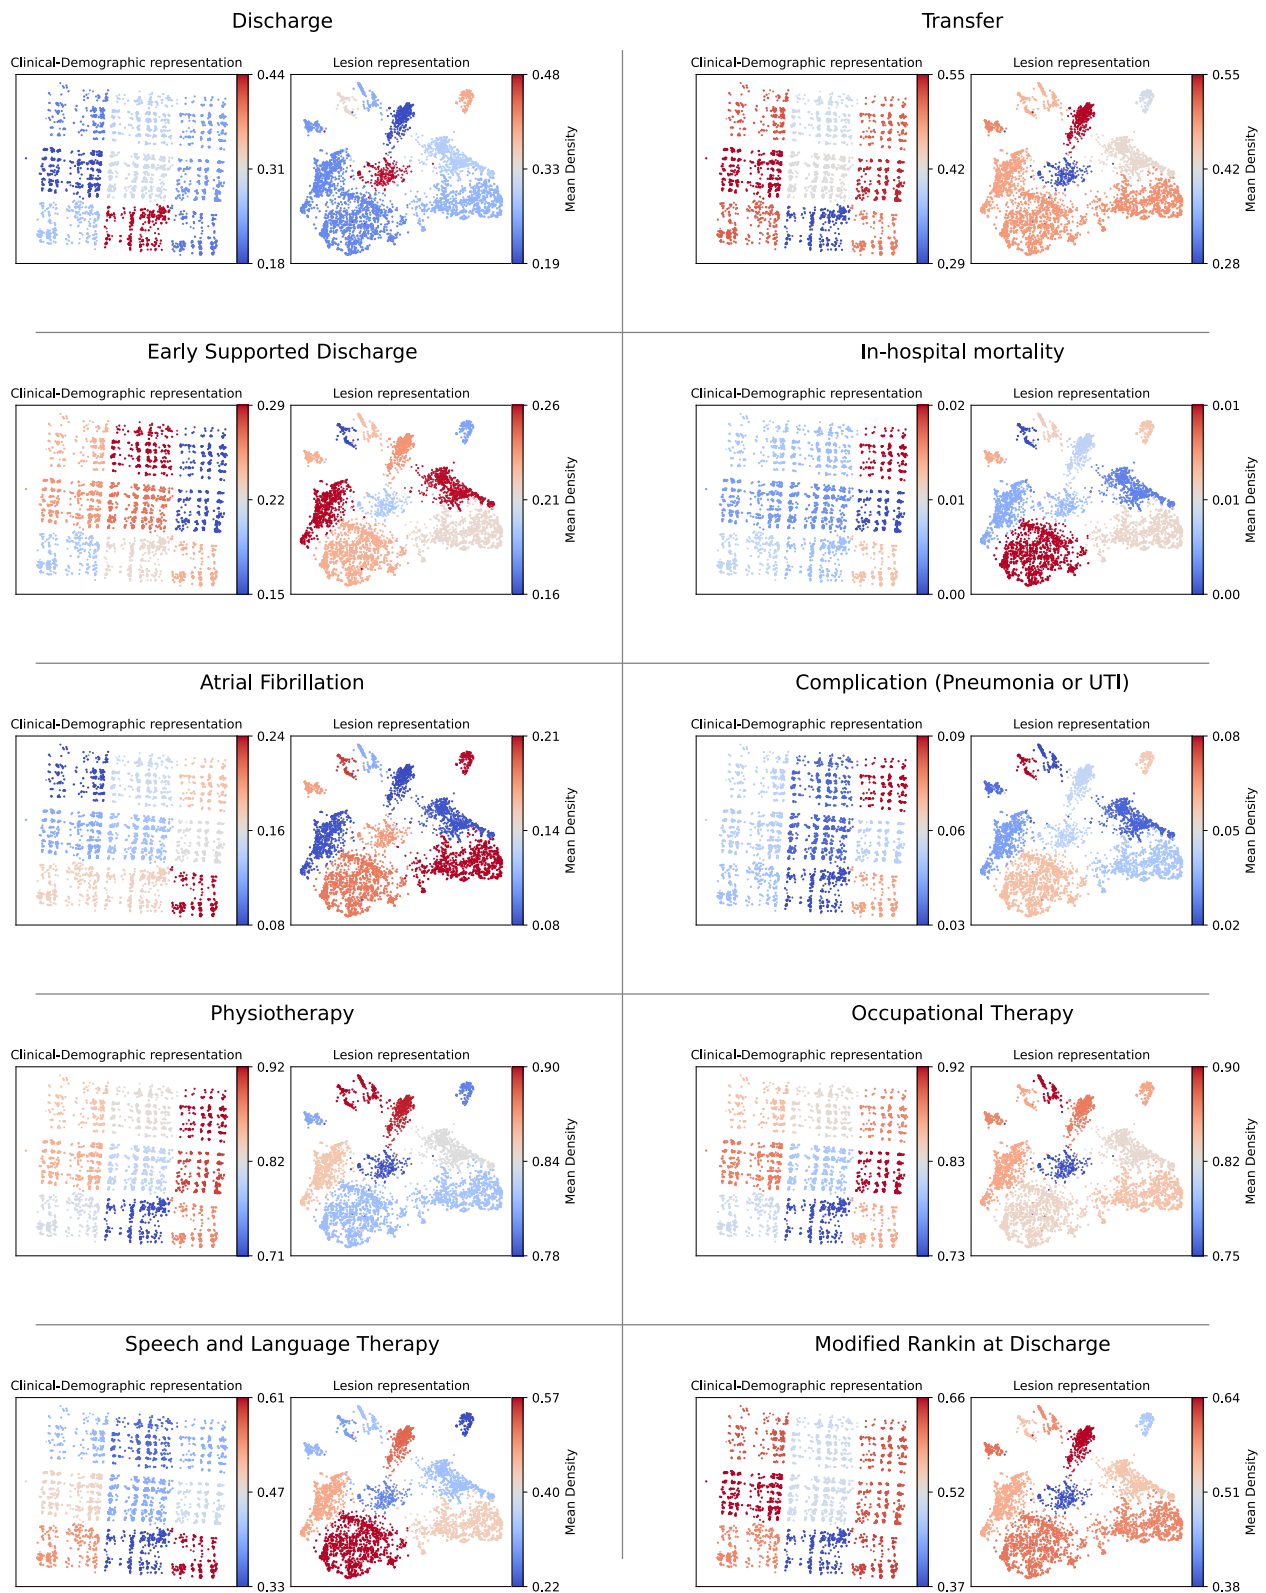

**Figure S3.** Each panel corresponds to a specific prediction target and contains two scatter plots: the clinical-demographic latent space (left) and the lesion latent space (right). Points represent latent clusters and are coloured according to the mean density of the corresponding target within each cluster, using a continuous colourmap with the colour bar normalised to the minimum and maximum values in each representation. The axes values are not shown; the range is identical across all plots.

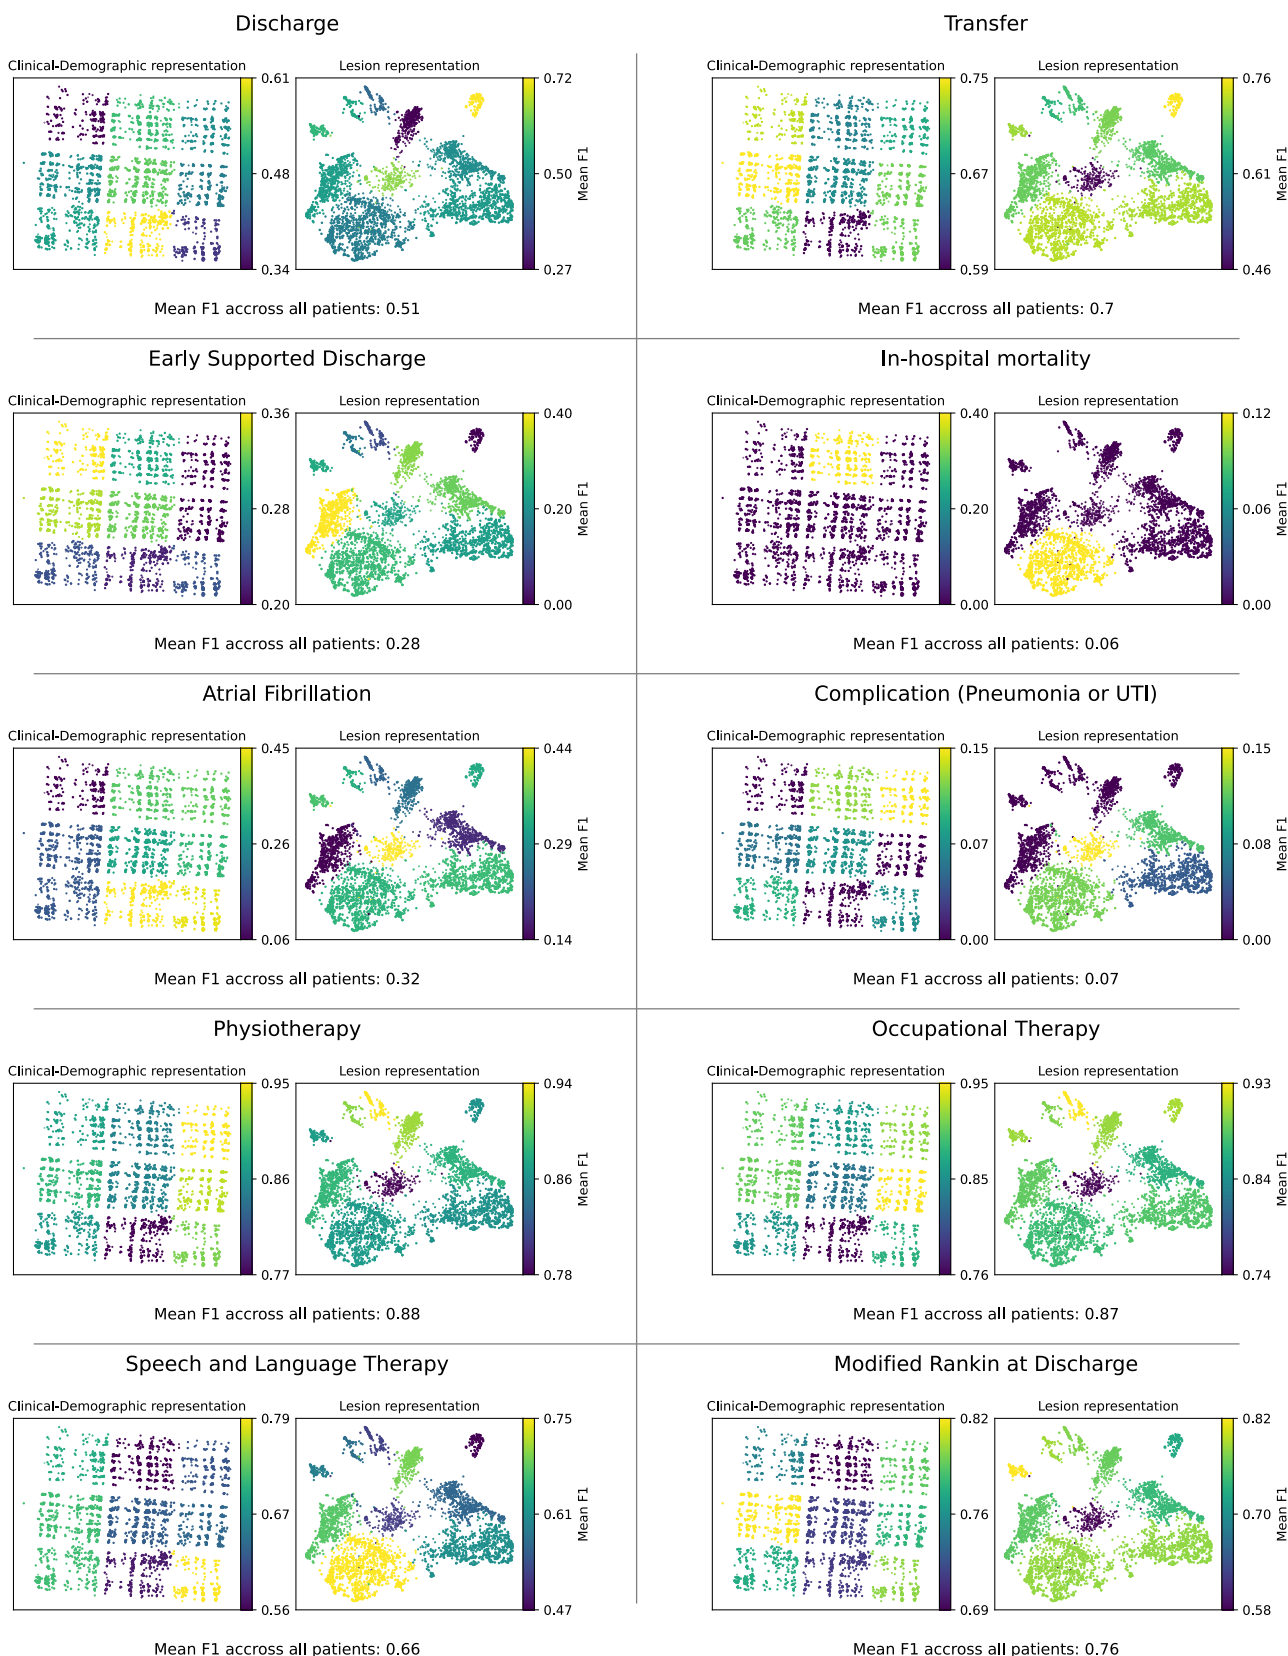

**Figure S4.** Identical to Fig. 5 in the main text, except that it reports the F1 score per cluster instead of balanced accuracy. The axes values are not shown; the range is identical across all plots.



## Sentinel Stroke National Audit Programme (SSNAP) data

SSNAP attributes used as predictors

| Attribute Name                      | Description                                                             |
|-------------------------------------|-------------------------------------------------------------------------|
| S1AgeOnArrival                      | Age of patient on arrival at hospital                                   |
| S1Gender                            | Patient's gender                                                        |
| S1Ethnicity                         | Patient's ethnicity                                                     |
| S1OnsetInHospital                   | Whether stroke onset occurred while patient was already in hospital     |
| S1OnsetDateType                     | Type/precision of stroke onset date (e.g., precise time, best estimate) |
| S1ArriveByAmbulance                 | Whether patient arrived at hospital by ambulance                        |
| S1FirstWard                         | First ward the patient was admitted to                                  |
| S1FirstStrokeUnitArrivalNA          | Whether arrival at first stroke unit is not applicable                  |
| S2CoMCongestiveHeartFailure         | Comorbidity: Congestive heart failure                                   |
| S2CoMHypertension                   | Comorbidity: Hypertension                                               |
| S2CoMAtrialFibrillation             | Comorbidity: Atrial fibrillation                                        |
| S2CoMDiabetes                       | Comorbidity: Diabetes                                                   |
| S2CoMStrokeTIA                      | Comorbidity: Previous stroke or TIA (Transient Ischemic Attack)         |
| S2CoMAFAntiplatelet                 | Atrial fibrillation patient on antiplatelet therapy                     |
| S2CoMAFAnticoagulant                | Atrial fibrillation patient on anticoagulant therapy                    |
| S2RankinBeforeStroke                | Modified Rankin Scale score before stroke (pre-stroke disability level) |
| S2NihssArrivalLoc                   | NIHSS on arrival: Level of consciousness                                |
| S2NihssArrivalLocQuestions          | NIHSS on arrival: Level of consciousness questions                      |
| S2NihssArrivalLocCommands           | NIHSS on arrival: Level of consciousness commands                       |
| S2NihssArrivalBestGaze              | NIHSS on arrival: Best gaze                                             |
| S2NihssArrivalVisual                | NIHSS on arrival: Visual field testing                                  |
| S2NihssArrivalFacialPalsy           | NIHSS on arrival: Facial palsy                                          |
| S2NihssArrivalMotorArmLeft          | NIHSS on arrival: Motor function left arm                               |
| S2NihssArrivalMotorArmRight         | NIHSS on arrival: Motor function right arm                              |
| S2NihssArrivalMotorLegLeft          | NIHSS on arrival: Motor function left leg                               |
| S2NihssArrivalMotorLegRight         | NIHSS on arrival: Motor function right leg                              |
| S2NihssArrivalLimbAtaxia            | NIHSS on arrival: Limb ataxia                                           |
| S2NihssArrivalSensory               | NIHSS on arrival: Sensory                                               |
| S2NihssArrivalBestLanguage          | NIHSS on arrival: Best language                                         |
| S2NihssArrivalDysarthria            | NIHSS on arrival: Dysarthria                                            |
| S2NihssArrivalExtinctionInattention | NIHSS on arrival: Extinction and inattention                            |
| S2Thrombolysis                      | Whether thrombolysis was performed                                      |
| S2ThrombolysisNoButTimeWindow       | Thrombolysis not given: Outside time window                             |

| <b>Attribute Name</b>                    | <b>Description</b>                                            |
|------------------------------------------|---------------------------------------------------------------|
| S2ThrombolysisNoButComorbidity           | Thrombolysis not given: Due to comorbidity                    |
| S2ThrombolysisNoButMedication            | Thrombolysis not given: Due to medication contraindication    |
| S2ThrombolysisNoButRefusal               | Thrombolysis not given: Patient/family refusal                |
| S2ThrombolysisNoButAge                   | Thrombolysis not given: Due to age                            |
| S2ThrombolysisNoButImproving             | Thrombolysis not given: Symptoms improving                    |
| S2ThrombolysisNoButTooMildSevere         | Thrombolysis not given: Symptoms too mild or too severe       |
| S2ThrombolysisNoButTimeUnknownWakeUp     | Thrombolysis not given: Time of onset unknown/wake-up stroke  |
| S2ThrombolysisNoButOtherMedical          | Thrombolysis not given: Other medical reason                  |
| S2ThrombolysisNoButHaemorrhagic          | Thrombolysis not given: Hemorrhagic stroke                    |
| S2SwallowScreening4HrsNotPerformed       | Whether swallow screening within 4 hours was not performed    |
| S2SwallowScreening4HrsNotPerformedReason | Reason why swallow screening within 4 hours was not performed |

#### SSNAP attributes used as outcomes

| <b>Attribute Name</b>                                            | <b>Description</b>                                                                                                                                                |
|------------------------------------------------------------------|-------------------------------------------------------------------------------------------------------------------------------------------------------------------|
| S7DischargeType – 'H'                                            | Discharged to own home                                                                                                                                            |
| S7DischargeType – 'T', 'TN'                                      | Discharged to transfer - another inpatient care team ('T') or non-stroke specialist team ('TN')                                                                   |
| S7DischargedEsdmr – 'NS', 'SNS'                                  | Discharged with Early Supported Discharge and Multidisciplinary Team - Nursing home/Residential care with stroke support ('NS') or without stroke support ('SNS') |
| S7DischargeType – 'D'                                            | Patient died during admission                                                                                                                                     |
| S7DischargeAtrialFibrillation + S2CoMAtrialFibrillation - 'Y'    | Patient with atrial fibrillation (either known on admission or diagnosed during admission)                                                                        |
| S5UrinaryTractInfection7Days + S5PneumoniaAntibiotics7Days – 'Y' | Patient developed urinary tract infection and/or pneumonia requiring antibiotics within first 7 days                                                              |
| S4Physio – 'Y'                                                   | Patient received physiotherapy during admission                                                                                                                   |
| S4OccTher – 'Y'                                                  | Patient received occupational therapy during admission                                                                                                            |
| S4SpeechLang – 'Y'                                               | Patient received speech and language therapy during admission                                                                                                     |
| S7RankinDischarge - >=3                                          | Modified Rankin Scale score at discharge of 3 or higher (moderate to severe disability or death)                                                                  |

## Ethnicity Codes and Groupings

Below is a descriptive mapping of the SSNAP ethnicity codes (A–S, Z, 99) used in our analysis. These codes were aggregated into five groups (G1–G5) as described in the Methods. The definitions and grouping scheme were derived from the SSNAP data dictionary.

| Code | Description                 |
|------|-----------------------------|
| A    | White British               |
| B    | White Irish                 |
| C    | Any other white background  |
| D    | White and Black Caribbean   |
| E    | White and Black African     |
| F    | White and Asian             |
| G    | Any other mixed background  |
| H    | Indian                      |
| J    | Pakistani                   |
| K    | Bangladeshi                 |
| L    | Any other Asian background  |
| M    | Caribbean                   |
| M    | African                     |
| P    | Any other Black background  |
| R    | Chinese                     |
| S    | Any other ethnic background |
| Z    | Not stated                  |
| 99   | Not known                   |
